# Supplementary material
Source: PubMed Central journal article supplement (PMC2335192)
Supplement: cmaj_178_10_1320__1.pdf [file cmaj_178_10_1320__1.pdf]

## Santé publique

## La santé mentale au Canada : à tout jamais hors de l'ombre

Michael Kirby PhD

Le Canada est le seul pays du G8 à ne pas s'être doté d'une stratégie nationale en matière de santé mentale. C'est ce qu'a entre autre révélé l'enquête sur la santé mentale au Canada réalisée par le Comité sénatorial permanent des affaires sociales, des sciences et de la technologie. Tout aussi sidérant est le fait que le rapport du comité sénatorial, *De l'ombre à la lumière*<sup>1</sup>, soit le premier rapport national sur la santé mentale, alors qu'on estime à plus de 300 le nombre de rapports déjà publiés sur les problèmes de santé physique.

Parmi les nombreuses recommandations du rapport, mentionnons la création d'une commission sur la santé mentale, chargée d'agir à titre de catalyseur de la réforme qui s'impose. On néglige la santé mentale depuis beaucoup trop longtemps au Canada et dans le milieu de la santé mentale, les malades, leurs proches, leurs aidants, les professionnels de la santé, les chercheurs et les gouvernements s'entendent pour dire qu'il faut agir maintenant.

En août 2007, le Premier ministre a annoncé la mise sur pied de la Commission de la santé mentale du Canada<sup>2</sup>; cette annonce a été accueillie par une ovation lors d'une séance plénière de l'Initiative internationale pour un leadership en santé mentale. Cette commission jouera un rôle très important au cours de la prochaine décennie et en agissant sur plusieurs fronts, tels que sensibilisation, dialogue et mesures concrètes, elle veillera à ce que la santé mentale sorte de l'ombre pour toujours.

Le gouvernement fédéral a accepté de soutenir les travaux de la commission (s'engageant à injecter 15 millions de dollars par année, une fois que la commission sera pleinement fonctionnelle); la commission a en outre reçu l'appui de tous les gouvernements des provinces et des territoires (à l'exception du Québec). La commission travaillera toutefois indépendamment des différents paliers de gouvernement.

## Initiatives stratégiques

La commission met de l'avant 3 initiatives stratégiques qui émanent des recommandations du comité sénatorial : élaborer une stratégie nationale en matière de santé mentale, lancer une campagne de lutte contre les préjugés qui s'échelonnent sur 10 ans et établir un centre national d'échange des connaissances.

Au moment de mettre sur pied cette stratégie nationale canadienne, la commission s'inspirera des expériences d'autres pays à ce chapitre, notamment celles de l'Australie, de la Nouvelle-Zélande et du Royaume-Uni. De plus, *De l'ombre à la lumière* constitue un document de référence inestimable pour la commission, alors qu'elle se penchera sur les

## Points saillants

- En 2007, la Commission de la santé mentale au Canada a été mise sur pied à titre de catalyseur pour promouvoir le dialogue à l'échelle nationale sur la santé mentale au Canada.
- La Commission propose 3 initiatives stratégiques : mettre sur pied une stratégie nationale en matière de santé mentale, combattre la stigmatisation et la discrimination et promouvoir l'échange des connaissances.
- La stigmatisation est un problème répandu au Canada, y compris chez les travailleurs de la santé et même chez les professionnels de la santé mentale.
- Les personnes directement touchées par des problèmes de santé mentale font partie intégrante de toutes les activités de la Commission.

services de santé mentale accessibles au Canada et sur les lacunes et les besoins à combler en matière de soins.

Ce processus d'élaboration d'une stratégie nationale demandera environ 3 ans et la commission consultera en profondeur tous les groupes concernés. L'objectif global de la stratégie est de montrer de quelle façon mieux coordonner et intégrer les efforts déployés pour améliorer le sort des personnes aux prises avec la maladie mentale et celui de leurs proches.

La stratégie nationale témoignera du fait que chaque province et territoire est responsable de la majeure partie des soins de santé dispensés sur son territoire. Elle proposera une série de principes, de même que des mesures concrètes, éprouvées que chaque juridiction pourra mettre en œuvre selon sa situation. La commission élaborera un plan pour promouvoir le changement, mais il reviendra à d'autres, y compris aux professionnels de la santé, de l'appliquer. Le vaste processus de consultation prévu durant la phase d'élaboration devrait toutefois constituer une base solide pour soutenir son application.

La deuxième initiative stratégique est une campagne pour lutter contre les préjugés à l'endroit de la maladie mentale et contre la discrimination dont font l'objet les personnes qui en souffrent. Cette stratégie évoluera avec la commission. La stigmatisation et la discrimination dont sont victimes les personnes atteintes de problèmes de santé mentale de la part des gens de tous horizons qu'elles côtoient (famille, milieu de

Le professeur Kirby est président de la Commission de la santé mentale du Canada à Ottawa (Ont.)

travail, voisins, proches et professionnels de la santé) sont parfois graves, incapacitantes et persistantes.

Selon des données internationales, la stigmatisation et la discrimination exercent des effets dévastateurs et une correction s'impose à plusieurs niveaux. La stigmatisation est en effet un phénomène qui ne connaît pas de frontières : écoles, établissements de soins de santé, établissements carcéraux et cours de justice et lieux de travail, aussi bien que l'accès aux soins de santé. Les professionnels de la santé devront travailler avec la commission pour comprendre et combattre la stigmatisation où qu'elle se manifeste, y compris dans leurs propres rangs.

La commission a commencé à analyser divers aspects de la stigmatisation associée aux problèmes de santé mentale. Des échanges ont eu lieu avec d'autres pays qui ont organisé des campagnes de lutte aux préjugés contre la maladie mentale et on a recensé les programmes et initiatives existants au Canada. La commission a établi les bases à partir desquelles élaborer une initiative typiquement canadienne visant à lutter contre la stigmatisation et à éliminer la discrimination par le biais de ce processus.

La troisième initiative stratégique concerne l'échange de connaissances qui sera un important aspect des activités de la commission. Un centre d'échange des connaissances servira de service des communications et donnera aux Canadiens de tous les milieux le moyen de dialoguer efficacement avec la commission et de créer divers groupes réunis autour d'intérêts communs. Ce centre offrira des renseignements sur une vaste gamme de sujets, établira des liens avec d'autres sites Web et centres de renseignements. On pourra y consulter des documents importants, tels que mémoires, politiques, énoncés de position et consensus sur les meilleures pratiques fondées sur des preuves. Les gens pourront aussi formuler leurs commentaires sur les initiatives de la commission, comme la stratégie nationale. Le centre veillera également en priorité à faire connaître les pratiques les plus efficaces et les plus prometteuses émanant des meilleures recherches disponibles.

## L'offre et la demande en matière de services en santé mentale

Il va sans dire que tous les professionnels de la santé jouent un rôle déterminant dans la promotion du bien-être mental aussi bien que physique des individus, notamment en les aidant à vivre pleinement et à exploiter tout leur potentiel. Les professionnels de la santé souhaitent ce qu'il y a de mieux pour leurs clients et leurs patients et pourtant, dans bien des cas, les systèmes en place y font obstacle. La commission voudra travailler étroitement avec les professionnels de la santé et leurs associations pour résoudre les problèmes d'accessibilité aux services.

L'offre et la demande représentent un défi de taille. À mesure que les problèmes de santé mentale sortiront de l'ombre, la demande augmentera substantiellement à l'endroit des programmes de mieux-être et prévention, des traitements et des services de prise en charge dans les cas

d'invalidité. Les effectifs canadiens en santé mentale ne suffisent pas à la demande.

Les prestataires de services devront travailler étroitement avec la commission pour trouver de nouvelles façons de répondre à cette demande accrue tout en fournissant des services de grande qualité fondés sur les meilleures preuves possibles. Bien sûr, nous ne pourrons jamais donner à tous tout ce qu'ils désirent, mais le Canada doit faire plus pour un grand nombre d'individus actuellement laissés à eux-mêmes.

Il faut de toute urgence que les prestataires collaborent étroitement entre eux et travaillent en équipe pour soutenir les aidants naturels et autres personnes soignantes. Les modèles canadiens et internationaux de collaboration vont bien au-delà du modèle biomédical classique. Les médecins devront impérativement modifier leur pratique pour tenir compte de ces nouvelles réalités. En matière de santé mentale, par exemple, ce sont les médecins de famille que consultent au premier chef environ 85 % des personnes atteintes. Cette importante responsabilité des médecins de famille découle directement de l'organisation du financement public de nos services au Canada et le fardeau qui leur incombe est bien lourd. Nous devons modifier l'accès aux services et aider les médecins de famille à mieux se préparer à réagir face à une grande diversité de problèmes de santé mentale, en mettant à contribution d'autres professionnels et spécialistes en santé mentale.

## La santé mentale chez les professionnels de la santé

Bien sûr, de nombreux professionnels qui œuvrent dans le domaine de la santé mentale éprouvent eux-mêmes un niveau élevé de stress et de détresse psychologique. Des études réalisées par des chercheurs indépendants et des organisations nationales, comme l'Association médicale canadienne, peuvent en attester. Il s'agit d'un problème réel. La commission devra se pencher sur le bien-être psychologique des professionnels de la santé mentale.

On sait que la maladie mentale influe sur la santé physique des personnes et vice versa. Depuis beaucoup trop longtemps, au Canada, santé physique et santé psychologique sont compartimentées; nous avons séparé la tête du corps. Or, cette attitude est contre-productive, voire nuisible. La commission cherchera des façons de rapprocher davantage les 2 domaines dans le cadre d'une approche intégrée. Il est temps de replacer la tête sur le corps.

La stigmatisation est un problème grave. Les témoignages entendus par le comité sénatorial permanent et rendus par d'autres pays rappellent tragiquement le fait déroutant que la stigmatisation s'observe chez tous les professionnels de la santé, y compris chez les spécialistes de la santé mentale. Les personnes les mieux placées pour aider les patients atteints de maladies mentales semblent paradoxalement entretenir des attitudes négatives à leur endroit. Les raisons de cette stigmatisation sont probablement multiples et peuvent reposer sur l'ignorance, des expériences négatives, le surme-

nage et de piètres conditions de travail. La commission prend très au sérieux ce problème et devra venir en aide aux patients et aux professionnels de la santé pour redresser efficacement la situation.

## Le rétablissement

On observe un fort consensus international autour de la notion de rétablissement chez les personnes aux prises avec des problèmes de santé mentale. Cette notion suppose l'adhésion au principe selon lequel il faut aider les gens à exploiter leur plein potentiel à l'intérieur des limites de leur maladie.

Le rétablissement requiert un soutien approprié aux patients, y compris par le biais de groupes d'entraide, un soutien aux familles ou aux aidants, des interventions à l'échelle des collectivités et des programmes de logement avec services de soutien. La notion de rétablissement suppose que l'on s'écarte des modèles habituels de prestation de services et que l'on collabore plus étroitement avec les patients, sans simplement chercher à résoudre leurs problèmes à leur place ni se contenter de soulager leurs symptômes.

La commission aura besoin de l'aide des médecins et de leurs associations pour corriger ces importantes lacunes auxquelles la société canadienne fait face. La demande est considérable. Le statu quo est inacceptable.

## La commission

La commission est régie par un conseil d'administration constitué de 11 directeurs de l'extérieur du gouvernement choisis parmi plus de 500 candidats. Il compte également 6 membres nommés par les gouvernements des provinces et des territoires pour veiller au maintien de liens solides avec ces juridictions. Le conseil est très représentatif de la communauté concernée par la santé mentale et inclut des personnes aux prises avec des troubles mentaux, des aidants naturels, des travailleurs auprès de groupes d'entraide et des prestataires de services. On note une représentation substantielle des peuples autochtones du Canada.

La commission dispose de 8 comités consultatifs sur les sciences, les enfants et les adolescents, les personnes âgées, les questions familiales, le travail, la loi, les systèmes de prestation de services et les peuples des Premières Nations, Inuits et Métis. La commission a l'intention de développer des modèles de collaboration entre les divers milieux : santé, éducation, travail, secteur privé, organismes à but non lucratif, services sociaux et services juridiques.

Une importante question vient à l'esprit : «pourquoi n'avons-nous pas de comité consultatif pour les personnes atteintes de maladies mentales?». La commission insiste sur le fait que les personnes atteintes de problèmes de santé mentale sont au centre de son existence et de toutes ses activités. Ces personnes sont bien représentées au sein du conseil et

elles font partie des différents comités consultatifs. Cette structure fait en sorte qu'elles peuvent s'exprimer à tous les niveaux de la commission et non seulement au sein d'un seul comité consultatif.

La commission sera un catalyseur de la réforme qui s'amorce et probablement le plus puissant des catalyseurs de changements en matière de santé mentale dans l'histoire canadienne. La commission n'est toutefois ni un organisme prestataire de services, ni un groupe de défense des intérêts. Elle fournit aux juridictions et aux intervenants des outils et l'information nécessaires pour améliorer le sort des personnes et faciliter leur accès aux services et au soutien voulus en matière de santé mentale. La commission verra à promouvoir un dialogue national qui s'échelonne sur 10 ans dans les domaines de la santé et de la maladie mentale au Canada. Par le biais de ses travaux, la commission a l'intention d'encourager et de soutenir un changement réel partout au Canada. La mise en œuvre concrète des programmes et des services reviendra toutefois à d'autres.

## Conclusion

La commission aura d'importants défis à relever et elle n'a pas le pouvoir d'imposer sa vision ni sa stratégie. La stigmatisation, l'incompréhension et la discrimination sont des phénomènes répandus et bien ancrés. Les ressources sont limitées et la conjoncture propice à l'application de mesures concrètes n'est pas éternelle. L'appui du plus grand nombre de juridictions et d'intervenants est indispensable.

Malgré l'ampleur de la tâche, je demeure confiant. Directement ou indirectement, chaque Canadien a été touché par des problèmes de santé mentale ou une maladie psychiatrique. Beaucoup trop de gens ont été incapables d'obtenir l'aide voulue. Le pays est prêt pour un changement : le temps est venu.

Cet article a été soumis à l'examen des pairs.

**Conflit d'intérêts déclarés :** Aucun.

## RÉFÉRENCES

1. Comité sénatorial permanent des affaires sociales, des sciences et de la technologie. *De l'ombre à la lumière — La transformation des services concernant la santé mentale, la maladie mentale et la toxicomanie au Canada*. Le Comité : 2006. Accessible à l'adresse <http://www.parl.gc.ca/39/1/parlbus/commbus/senate/Com-f/SOCI-F/rep-f/rep02may06-f.htm> (consulté le 1er avril 2008).
2. La Commission de la santé mentale au Canada. Ottawa (Ont.) : la Commission. Accessible à l'adresse : <http://www.mentalhealthcommission.ca/mhccfr.html> (consulté le 1er avril 2008).

**Correspondance :** Professeur Michael Kirby, Commission de la santé mentale du Canada, bureau 1800, 10301 Southport Lane SW, Calgary AB T2W 1S7; télécopieur : 613 798-2989; [mkirby@mentalhealthcommission.ca](mailto:mkirby@mentalhealthcommission.ca)
